# Supplementary material for: Urinary Free Cortisol Determination and Interferences Studies Using Liquid Chromatography Coupled to Tandem Mass Spectrometry after On-Line Solid Phase Extraction Based on TurboflowTM Chromatography
Source: MDPI journal article supplement (doi:10.3390/metabo13101063), 2023-10-09
Supplement: s1 [file s1]

## Supplementary Materials

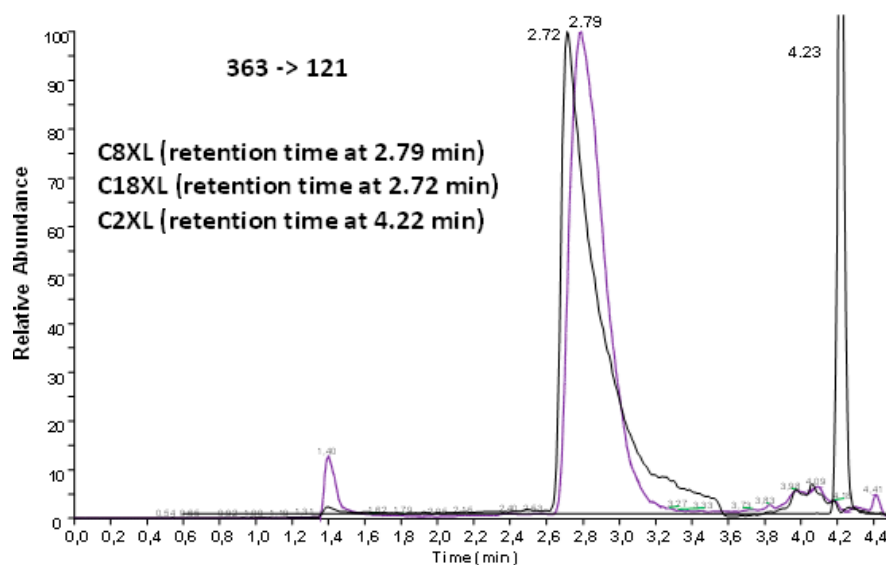

**Figure S1: Chromatograms obtained with C8XL, C18XL and C2XL extraction columns.** For C8XL and C18XL columns, the initial percentage of B1 used is 40%. For C2XL, the initial percentage of B1 used is 25%. The chromatogram obtained with C2XL is not at the same scale as the others.

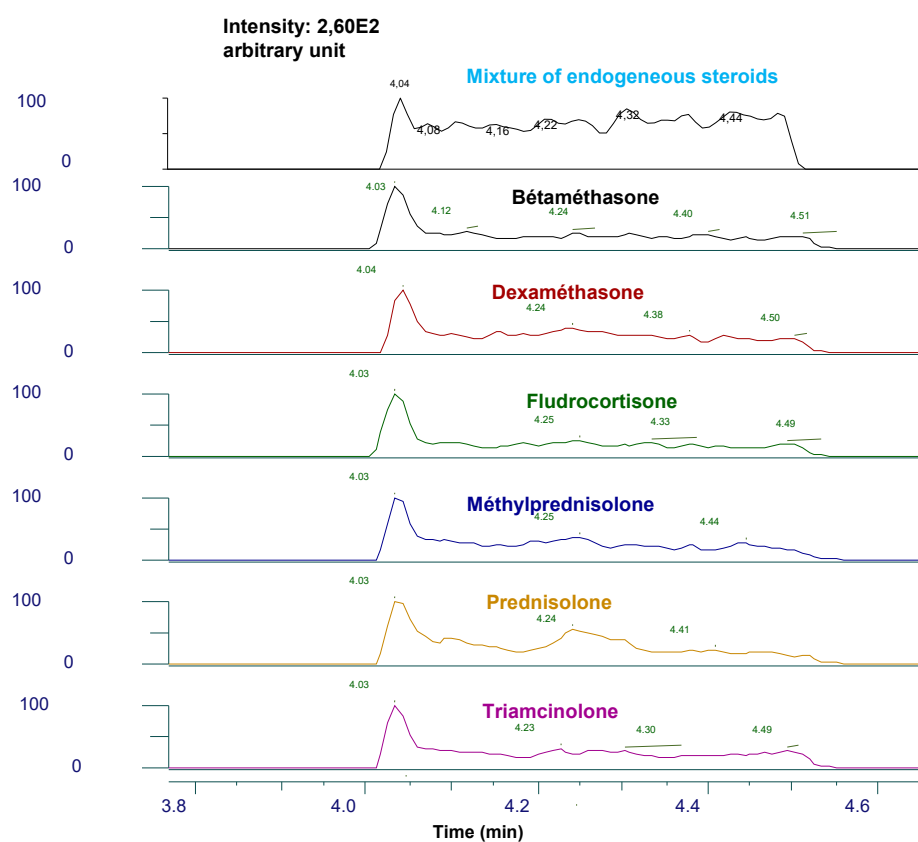

**Figure S2: Endogeneous and exogeneous steroids analysis by LC-MS/MS.** Chromatograms (363->121 and 366->124) obtained by analyzing solutions of exogenous and endogenous steroids listed in the part 2.1, with the LC-MS/MS method described in 2.4 and 2.5 (cortisol analysis).

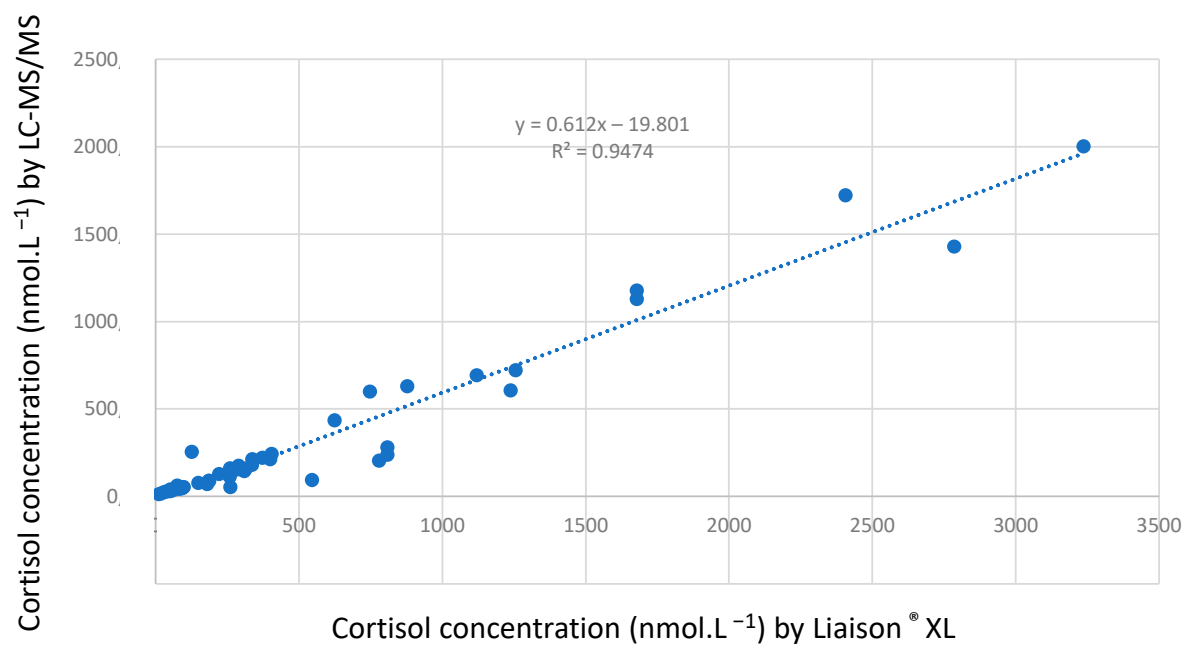

**Figure S3: Correlation between urinary free cortisol concentration values determined by LC-MS/MS and Liaison<sup>®</sup> XL (n=47).**
